# Supplementary material for: NUSAP1 and PCLAF (KIA0101) Downregulation by Neoadjuvant Therapy is Associated with Better Therapeutic Outcomes and Survival in Breast Cancer
Source: J Oncol. 2022 Nov 28;2022:6001947. doi: 10.1155/2022/6001947 (PMC9722309; doi:10.1155/2022/6001947)
Supplement: Supplementary Materials — Supplementary Figure S1. Heatmap of pCR samples: SS (n = 16) vs. BS (n = 16). In the top row, SS samples are denoted by the blue header, and the red title indicates BS samples. The heatmap shows one sample for each column and one gene or probe for each horizontal line. The color indicates gene expression value intensities, where the pink-red gradient represents overexpression, and the light blue–dark blue gradient represents underexpression. SupplementaryFigure S2. Heatmap of non-pCR samples: SS (n = 31) vs. BS (n = 31). In the top row, BS samples are denoted by the blue header, and the red title indicates SS samples. The heatmap shows one sample for each column and one gene or probe for each horizontal line. The color indicates gene expression value intensities, where the pink-red gradient represents overexpression, and the light blue–dark blue gradient represents underexpression. Supplementary Figure S3. Box plots showing microarray selected genes validation by RT-qPCR (NUSAP1, PCLAF1, DST, and MME). a and b represent expression levels of NUSAP1 and PCLAF1, respectively. c and d represent the expression of DST and MME, respectively. An unpaired t-test with Welch's correction was used for comparisons. Supplementary Figure S4. Expression levels of NUSAP1 according to the molecular subtype after NCT (SS). LA, luminal A; LB, luminal B; TN = triple negative. One-way ANOVA and the Holm–Sidak multiple comparisons test were used for comparisons. Supplementary Figure S5. Microscopic evaluation of tumor-infiltrating lymphocytes (TILs). (a) Low TILs, 10×. Fibrous stroma is observed between the tumor cells, with little lymphoplasmacytic infiltration at 5%. (b) Moderate TILs, 10×. Moderate lymphoplasmacytic infiltrate is seen in the tumoral stroma at 30%. (c) High TILs, 10×. A dense lymphoplasmacytic infiltrate was observed in the stroma between the neoplastic cells in the upper left area at 80%. Supplementary Figure S6. Overall survival according to the molecular subtype afte [file 6001947.f1.zip › Supplementary File S1 pCR-SS vs pCR-BS.xlsx]

## Sheet: a. 14 DEGs
Gene Symbol	Fold Change	FDR	Gene name
FOSB	17.38	0.0111	FBJ murine osteosarcoma viral oncogene homolog B
CYR61	11.66	0.0168	cysteine-rich, angiogenic inducer, 61
EGR1	10.45	0.0029	early growth response 1
ATF3	9.59	0.0088	activating transcription factor 3
DUSP1	7.43	0.005	dual specificity phosphatase 1
APOLD1	6.23	0.0208	apolipoprotein L domain containing 1
JUN	5.96	0.0043	jun proto-oncogene
PTGS2	5.4	0.0241	prostaglandin-endoperoxide synthase 2 (prostaglandin G/H synthase and cyclooxygenase)
EGR2	5.28	0.0204	early growth response 2
RGS1	4.55	0.0208	regulator of G-protein signaling 1
ADAMTS1	3.51	0.0058	ADAM metallopeptidase with thrombospondin type 1 motif 1
CDKN3	-4.71	0.0088	cyclin-dependent kinase inhibitor 3
RRM2	-9.39	0.0268	ribonucleotide reductase M2
TOP2A	-17.77	0.036	topoisomerase (DNA) II alpha

## Sheet: b. g Profiler beta
source	term_name	term_id	adjusted_p_value	negative_log10_of_adjusted_p_value	term_size	query_size	intersection_size	effective_domain_size	intersections
GO:MF	DNA-binding transcription activator activity, RNA polymerase II-specific	GO:0001228	0.0303892	1.51728	341	14	4	17192	EGR1,ATF3,JUN,EGR2
GO:MF	DNA-binding transcription activator activity	GO:0001216	0.0321437	1.4929	346	14	4	17192	EGR1,ATF3,JUN,EGR2
GO:MF	protein tyrosine/serine/threonine phosphatase activity	GO:0008138	0.0427044	1.36953	25	14	2	17192	DUSP1,CDKN3
KEGG	IL-17 signaling pathway	KEGG:04657	0.00476774	2.32169	91	8	3	7559	FOSB,JUN,PTGS2
KEGG	C-type lectin receptor signaling pathway	KEGG:04625	0.00670151	2.17383	102	8	3	7559	JUN,PTGS2,EGR2
REAC	NGF-stimulated transcription	REAC:R-HSA-9031628	0.00272936	2.56394	39	12	3	10770	FOSB,EGR1,EGR2
REAC	Nuclear Events (kinase and transcription factor activation)	REAC:R-HSA-198725	0.0106009	1.97466	61	12	3	10770	FOSB,EGR1,EGR2
WP	Network map of SARS-CoV-2 signaling pathway	WP:WP5115	0.00248019	2.60552	215	13	5	7364	EGR1,DUSP1,JUN,PTGS2,RRM2
WP	VEGFA-VEGFR2 signaling pathway	WP:WP3888	0.00435254	2.36126	415	13	6	7364	CYR61,EGR1,APOLD1,JUN,PTGS2,ADAMTS1
WP	Hepatitis C and hepatocellular carcinoma	WP:WP3646	0.00925256	2.03374	50	13	3	7364	JUN,PTGS2,RRM2
WP	Orexin receptor pathway	WP:WP5094	0.0106277	1.97356	146	13	4	7364	FOSB,EGR1,EGR2,RRM2
WP	Quercetin and Nf-kB / AP-1 induced apoptosis	WP:WP2435	0.0392246	1.40644	16	13	2	7364	JUN,PTGS2
WP	Hair follicle development: cytodifferentiation - part 3 of 3	WP:WP2840	0.0434446	1.36206	84	13	3	7364	FOSB,JUN,EGR2
Link to get acces to results generated in g :Profiler b
https://biit.cs.ut.ee/gplink/l/6peFcsG7Sr
