# Supplementary material for: NUSAP1 and PCLAF (KIA0101) Downregulation by Neoadjuvant Therapy is Associated with Better Therapeutic Outcomes and Survival in Breast Cancer
Source: J Oncol. 2022 Nov 28;2022:6001947. doi: 10.1155/2022/6001947 (PMC9722309; doi:10.1155/2022/6001947)
Supplement: Supplementary Materials — Supplementary Figure S1. Heatmap of pCR samples: SS (n = 16) vs. BS (n = 16). In the top row, SS samples are denoted by the blue header, and the red title indicates BS samples. The heatmap shows one sample for each column and one gene or probe for each horizontal line. The color indicates gene expression value intensities, where the pink-red gradient represents overexpression, and the light blue–dark blue gradient represents underexpression. SupplementaryFigure S2. Heatmap of non-pCR samples: SS (n = 31) vs. BS (n = 31). In the top row, BS samples are denoted by the blue header, and the red title indicates SS samples. The heatmap shows one sample for each column and one gene or probe for each horizontal line. The color indicates gene expression value intensities, where the pink-red gradient represents overexpression, and the light blue–dark blue gradient represents underexpression. Supplementary Figure S3. Box plots showing microarray selected genes validation by RT-qPCR (NUSAP1, PCLAF1, DST, and MME). a and b represent expression levels of NUSAP1 and PCLAF1, respectively. c and d represent the expression of DST and MME, respectively. An unpaired t-test with Welch's correction was used for comparisons. Supplementary Figure S4. Expression levels of NUSAP1 according to the molecular subtype after NCT (SS). LA, luminal A; LB, luminal B; TN = triple negative. One-way ANOVA and the Holm–Sidak multiple comparisons test were used for comparisons. Supplementary Figure S5. Microscopic evaluation of tumor-infiltrating lymphocytes (TILs). (a) Low TILs, 10×. Fibrous stroma is observed between the tumor cells, with little lymphoplasmacytic infiltration at 5%. (b) Moderate TILs, 10×. Moderate lymphoplasmacytic infiltrate is seen in the tumoral stroma at 30%. (c) High TILs, 10×. A dense lymphoplasmacytic infiltrate was observed in the stroma between the neoplastic cells in the upper left area at 80%. Supplementary Figure S6. Overall survival according to the molecular subtype afte [file 6001947.f1.zip › Supplementary File S3 pCR-SS vs non-pCR-SS.xlsx]

## Sheet: a. 43 DEGs
Gene Symbol	Fold Change	FDR	Gene name
OXTR	15.5	0.0243	Oxytocin receptor
VEGFD (previous symbol FIGF); PIR-FIGF	13.86	0.0049	Vascular endothelial growth factor D; PIR-FIGF readthrough
COL6A6	9.84	0.0274	Collagen type VI alpha 6 chain
TUBB2B	6.54	0.0186	Tubulin beta 2B class IIb
CAVIN2 (previous symbol SDPR)	6.48	0.0279	Caveolae associated protein 2
INSYN2B (previous symbol FAM196B)	6.29	0.0124	Inhibitory synaptic factor family member 2B
CD300LG	5.93	0.029	CD300 molecule like family member g
HAS3	5.7	0.0067	Hyaluronan synthase 3
ABCB5	5.68	2.05e-05	ATP binding cassette subfamily B member 5
LRRN4CL	4.95	0.021	LRRN4 C-terminal like
ITIH5	4.72	0.0255	Inter-alpha-trypsin inhibitor heavy chain 5
SCN3A	4.51	0.0213	Sodium voltage-gated channel alpha subunit 3
CCDC178	4.3	0.025	Coiled-coil domain containing 178
PRRG3	4.12	0.0214	Proline rich and Gla domain 3
MME	4.02	0.0067	Membrane metalloendopeptidase
LRFN5	3.97	0.0193	Leucine rich repeat and fibronectin type III domain containing 5
ARHGAP20	3.96	0.0028	Rho GTPase activating protein 20
CNN1	3.86	0.0241	Calponin 1
ANKRD29	3.85	0.0204	Ankyrin repeat domain 29
ADAMTS5	3.71	0.0276	ADAM metallopeptidase with thrombospondin type 1 motif 5
DST	3.69	0.0213	Dystonin
ABCA9	3.57	0.0002	ATP binding cassette subfamily A member 9
GAS1RR	3.5	0.0068	GAS1 adjacent regulatory RNA
CLDN5	3.35	0.0192	Claudin 5
GPRASP1	3.31	0.0244	G protein-coupled receptor associated sorting protein 1
ASPA	3.3	0.0235	Aspartoacylase
FHL1	3.29	0.0292	Four and a half LIM domains 1
CCDC8	3.21	0.0257	Coiled-coil domain containing 8
PGM5	3.08	0.0199	Phosphoglucomutase 5
SCN4B	3.03	0.0231	Sodium voltage-gated channel beta subunit 4
SORD	-3.23	0.0244	Sorbitol dehydrogenase
H2BC5 (previous symbol HIST1H2BD)	-3.38	0.0287	H2B clustered histone 5
NOTCH1 (previous symbol HN1)	-3.42	0.0204	Notch receptor 1
AURKA	-4.06	0.0297	Aurora kinase A
ATAD2	-4.39	0.0257	ATPase family AAA domain containing 2
PMAIP1	-4.4	0.021	Phorbol-12-myristate-13-acetate-induced protein 1
CCNB1	-5.11	0.0194	Cyclin B1
PCLAF (previous symbol KIAA0101)	-5.75	0.0204	PCNA clamp associated factor
TPD52	-5.85	0.0047	Tumor protein D52
UBE2T	-5.91	0.0183	Ubiquitin conjugating enzyme E2 T
UBE2C	-5.96	0.0264	Ubiquitin conjugating enzyme E2 C
NUSAP1	-6.01	0.0298	Nucleolar and spindle associated protein 1
RRM2	-7.52	0.0226	Ribonucleotide reductase regulatory subunit M2

## Sheet: b. g Profiler beta
source	term_name	term_id	adjusted_p_value	negative_log10_of_adjusted_p_value	term_size	query_size	intersection_size	effective_domain_size	intersections
GO:BP	regulation of mitotic cell cycle	GO:0007346	0.032641	1.48624	386	36	7	16121	FHL1,CCDC8,AURKA,CCNB1,UBE2C,NUSAP1,RRM2
GO:CC	anchoring junction	GO:0070161	0.0312515	1.50513	703	38	8	16938	MME,CNN1,DST,CLDN5,FHL1,PGM5,SCN4B,NOTCH1
WP	Gastric cancer network 1	WP:WP2361	0.00527175	2.27805	27	20	3	7364	NOTCH1,AURKA,UBE2C
WP	Gastric cancer network 2	WP:WP2363	0.00886231	2.05245	32	20	3	7364	ATAD2,UBE2T,UBE2C
Link to get acces to results generated in g :Profiler b
https://biit.cs.ut.ee/gplink/l/c2VlICofSf

## Sheet: c. Bio-functions by IPA
© 2000-2022 QIAGEN. All rights reserved.
Diseases or Functions Annotation	p-value	Molecules	# Molecules
Malignant genitourinary solid tumor	2.03e-09	ABCA9,ABCB5,ADAMTS5,ANKRD29,ARHGAP20,ASPA,ATAD2,AURKA,CAVIN2,CCDC178,CCDC8,CCNB1,CD300LG,CLDN5,CNN1,COL6A6,DST,FHL1,GPRASP1,H2BC5,HAS3,INSYN2B,ITIH5,LRFN5,MME,NOTCH1,NUSAP1,OXTR,PCLAF,PGM5,PMAIP1,PRRG3,RRM2,SCN3A,SCN4B,SORD,TPD52,TUBB2B,UBE2C,UBE2T,VEGFD	41
Anogenital cancer	2.24e-09	ABCA9,ABCB5,ADAMTS5,ANKRD29,ARHGAP20,ASPA,ATAD2,AURKA,CAVIN2,CCDC178,CCDC8,CCNB1,CD300LG,CLDN5,CNN1,COL6A6,DST,FHL1,GPRASP1,H2BC5,HAS3,INSYN2B,ITIH5,MME,NOTCH1,NUSAP1,OXTR,PCLAF,PGM5,PMAIP1,PRRG3,RRM2,SCN3A,SCN4B,SORD,TPD52,TUBB2B,UBE2C,UBE2T,VEGFD	40
Female genital tract serous carcinoma	2.87e-09	AURKA,CCNB1,CLDN5,CNN1,DST,GPRASP1,H2BC5,NOTCH1,PMAIP1,RRM2,UBE2C	11
Pelvic serous carcinoma	2.87e-09	AURKA,CCNB1,CLDN5,CNN1,DST,GPRASP1,H2BC5,NOTCH1,PMAIP1,RRM2,UBE2C	11
Breast or gastric cancer	5.06e-09	ABCA9,ABCB5,ADAMTS5,ANKRD29,ARHGAP20,ATAD2,AURKA,CCDC178,CCNB1,CD300LG,CLDN5,CNN1,COL6A6,DST,GPRASP1,H2BC5,INSYN2B,ITIH5,LRFN5,LRRN4CL,MME,NOTCH1,NUSAP1,OXTR,PCLAF,PGM5,PMAIP1,PRRG3,RRM2,SCN3A,SCN4B,SORD,TPD52,UBE2C,UBE2T,VEGFD	36
Breast or gynecological cancer	1.38e-08	ABCA9,ABCB5,ADAMTS5,ANKRD29,ARHGAP20,ASPA,ATAD2,AURKA,CCDC178,CCDC8,CCNB1,CD300LG,CLDN5,CNN1,COL6A6,DST,FHL1,GPRASP1,H2BC5,INSYN2B,ITIH5,MME,NOTCH1,NUSAP1,OXTR,PCLAF,PGM5,PMAIP1,PRRG3,RRM2,SCN3A,SCN4B,SORD,TPD52,TUBB2B,UBE2C,VEGFD	37
Uterine serous papillary cancer	2.25e-08	AURKA,CCNB1,CLDN5,CNN1,DST,GPRASP1,PMAIP1,UBE2C	8
Breast or pancreatic cancer	2.89e-08	ABCA9,ADAMTS5,ANKRD29,ARHGAP20,ATAD2,AURKA,CCDC178,CCDC8,CCNB1,CD300LG,CNN1,COL6A6,DST,FHL1,GPRASP1,H2BC5,INSYN2B,ITIH5,MME,NOTCH1,NUSAP1,OXTR,PCLAF,PGM5,PMAIP1,PRRG3,RRM2,SCN3A,SCN4B,SORD,TPD52,UBE2C,VEGFD	33
Breast or ovarian cancer	6.46e-08	ABCA9,ADAMTS5,ANKRD29,ARHGAP20,ATAD2,AURKA,CCNB1,CD300LG,CNN1,COL6A6,DST,GPRASP1,H2BC5,ITIH5,MME,NOTCH1,NUSAP1,OXTR,PCLAF,PGM5,PMAIP1,PRRG3,RRM2,SCN3A,SCN4B,SORD,TPD52,UBE2C,VEGFD	29
Breast or colorectal cancer	1.12e-07	ABCA9,ABCB5,ADAMTS5,ANKRD29,ARHGAP20,ATAD2,AURKA,CAVIN2,CCDC178,CCNB1,CD300LG,CNN1,COL6A6,DST,FHL1,GPRASP1,H2BC5,INSYN2B,ITIH5,LRRN4CL,MME,NOTCH1,NUSAP1,OXTR,PCLAF,PGM5,PMAIP1,PRRG3,RRM2,SCN3A,SCN4B,SORD,TPD52,TUBB2B,UBE2C,VEGFD	36
Formation of solid tumor	1.14e-07	ABCA9,ABCB5,ADAMTS5,ANKRD29,ARHGAP20,ASPA,ATAD2,AURKA,CAVIN2,CCDC178,CCDC8,CCNB1,CD300LG,CLDN5,CNN1,COL6A6,DST,FHL1,GPRASP1,H2BC5,HAS3,INSYN2B,ITIH5,LRFN5,LRRN4CL,MME,NOTCH1,NUSAP1,OXTR,PCLAF,PGM5,PMAIP1,PRRG3,RRM2,SCN3A,SCN4B,SORD,TPD52,TUBB2B,UBE2C,UBE2T,VEGFD	42
Liver carcinoma	2.41e-07	ABCA9,ABCB5,ADAMTS5,ARHGAP20,ATAD2,AURKA,CAVIN2,CCDC178,CCNB1,CNN1,COL6A6,DST,FHL1,GPRASP1,INSYN2B,ITIH5,LRFN5,LRRN4CL,MME,NOTCH1,NUSAP1,PGM5,PMAIP1,PRRG3,RRM2,SORD,TPD52,UBE2C,UBE2T	29
Gastrointestinal tumor	3.72e-07	ABCA9,ABCB5,ADAMTS5,ANKRD29,ARHGAP20,ATAD2,AURKA,CAVIN2,CCDC178,CCDC8,CCNB1,CD300LG,CLDN5,CNN1,COL6A6,DST,FHL1,GPRASP1,H2BC5,HAS3,INSYN2B,ITIH5,LRFN5,LRRN4CL,MME,NOTCH1,NUSAP1,OXTR,PCLAF,PGM5,PMAIP1,PRRG3,RRM2,SCN3A,SCN4B,SORD,TPD52,TUBB2B,UBE2C,UBE2T,VEGFD	41
MYC mutation positive B-cell lymphoma	5.41e-07	AURKA,NUSAP1,PCLAF,RRM2,UBE2C	5
Colorectal tumor	6.1e-07	ABCA9,ABCB5,ADAMTS5,ARHGAP20,ATAD2,AURKA,CAVIN2,CCDC178,CCNB1,CD300LG,CNN1,COL6A6,DST,FHL1,H2BC5,INSYN2B,ITIH5,LRRN4CL,MME,NOTCH1,NUSAP1,PCLAF,PGM5,PMAIP1,PRRG3,RRM2,SCN3A,SCN4B,SORD,TUBB2B,UBE2C,VEGFD	32
Breast cancer	6.24e-07	ABCA9,ADAMTS5,ANKRD29,ARHGAP20,ATAD2,AURKA,CCNB1,CD300LG,CNN1,COL6A6,DST,GPRASP1,ITIH5,NOTCH1,NUSAP1,OXTR,PMAIP1,PRRG3,RRM2,SCN4B,SORD,TPD52,UBE2C,VEGFD	24
Hepato-pancreato-biliary cancer	7.55e-07	ABCA9,ABCB5,ADAMTS5,ANKRD29,ARHGAP20,ATAD2,AURKA,CAVIN2,CCDC178,CCDC8,CCNB1,CNN1,COL6A6,DST,FHL1,GPRASP1,INSYN2B,ITIH5,LRFN5,LRRN4CL,MME,NOTCH1,NUSAP1,PCLAF,PGM5,PMAIP1,PRRG3,RRM2,SCN3A,SORD,TPD52,UBE2C,UBE2T	33
Genital tract cancer	1.52e-06	ABCA9,ABCB5,ADAMTS5,ARHGAP20,ASPA,ATAD2,AURKA,CAVIN2,CCDC178,CCDC8,CCNB1,CLDN5,CNN1,COL6A6,DST,FHL1,GPRASP1,H2BC5,HAS3,INSYN2B,ITIH5,MME,NOTCH1,NUSAP1,PCLAF,PGM5,PMAIP1,PRRG3,RRM2,SCN3A,TPD52,TUBB2B,UBE2C,UBE2T,VEGFD	35
Uterine tumor	1.96e-06	ABCA9,ABCB5,ADAMTS5,ASPA,ATAD2,AURKA,CAVIN2,CCDC178,CCDC8,CCNB1,CLDN5,CNN1,COL6A6,DST,FHL1,GPRASP1,H2BC5,INSYN2B,ITIH5,NOTCH1,NUSAP1,PGM5,PMAIP1,PRRG3,RRM2,SCN3A,TUBB2B,UBE2C,VEGFD	29
Pelvic cancer	2.34e-06	ABCA9,ABCB5,ADAMTS5,ANKRD29,ARHGAP20,ASPA,ATAD2,AURKA,CAVIN2,CCDC178,CCDC8,CCNB1,CLDN5,CNN1,COL6A6,DST,FHL1,GPRASP1,H2BC5,HAS3,INSYN2B,ITIH5,LRFN5,NOTCH1,NUSAP1,PCLAF,PGM5,PMAIP1,PRRG3,RRM2,SCN3A,TPD52,TUBB2B,UBE2C,UBE2T,VEGFD	36
Abnormality of endometrium	2.37e-06	ABCA9,ABCB5,ADAMTS5,ANKRD29,ASPA,ATAD2,AURKA,CCDC178,CCDC8,CCNB1,CLDN5,CNN1,COL6A6,DST,FHL1,GPRASP1,H2BC5,INSYN2B,ITIH5,NOTCH1,NUSAP1,PGM5,PMAIP1,PRRG3,SCN3A,TUBB2B,UBE2C,VEGFD	28
Genital tumor	2.42e-06	ABCA9,ABCB5,ADAMTS5,ARHGAP20,ASPA,ATAD2,AURKA,CAVIN2,CCDC178,CCDC8,CCNB1,CLDN5,CNN1,COL6A6,DST,FHL1,GPRASP1,H2BC5,HAS3,INSYN2B,ITIH5,MME,NOTCH1,NUSAP1,PCLAF,PGM5,PMAIP1,PRRG3,RRM2,SCN3A,TPD52,TUBB2B,UBE2C,UBE2T,VEGFD	35
Tumorigenesis of reproductive tract	3.06e-06	ABCA9,ABCB5,ADAMTS5,ASPA,ATAD2,AURKA,CAVIN2,CCDC178,CCDC8,CCNB1,CLDN5,CNN1,COL6A6,DST,FHL1,GPRASP1,H2BC5,INSYN2B,ITIH5,NOTCH1,NUSAP1,PCLAF,PGM5,PMAIP1,PRRG3,RRM2,SCN3A,TPD52,TUBB2B,UBE2C,VEGFD	31
Female genital neoplasm	3.17e-06	ABCA9,ABCB5,ADAMTS5,ASPA,ATAD2,AURKA,CAVIN2,CCDC178,CCDC8,CCNB1,CLDN5,CNN1,COL6A6,DST,FHL1,GPRASP1,H2BC5,INSYN2B,ITIH5,NOTCH1,NUSAP1,PCLAF,PGM5,PMAIP1,PRRG3,RRM2,SCN3A,TPD52,TUBB2B,UBE2C,VEGFD	31
Liver tumor	3.35e-06	ABCA9,ABCB5,ADAMTS5,ARHGAP20,ATAD2,AURKA,CAVIN2,CCDC178,CCNB1,CNN1,COL6A6,DST,FHL1,GPRASP1,INSYN2B,ITIH5,LRFN5,LRRN4CL,MME,NOTCH1,NUSAP1,PGM5,PMAIP1,PRRG3,RRM2,SCN3A,SORD,TPD52,UBE2C,UBE2T	30
Gastrointestinal tract cancer	3.71e-06	ABCA9,ABCB5,ADAMTS5,ANKRD29,ARHGAP20,ATAD2,AURKA,CAVIN2,CCDC178,CCDC8,CCNB1,CD300LG,CLDN5,CNN1,COL6A6,DST,FHL1,GPRASP1,H2BC5,HAS3,INSYN2B,ITIH5,LRFN5,LRRN4CL,MME,NOTCH1,NUSAP1,OXTR,PCLAF,PGM5,PMAIP1,PRRG3,RRM2,SCN3A,SCN4B,TPD52,TUBB2B,UBE2C,UBE2T,VEGFD	40
Central nervous system tumor	3.73e-06	ABCB5,ADAMTS5,ANKRD29,ARHGAP20,ASPA,ATAD2,AURKA,CAVIN2,CCDC178,CCDC8,CCNB1,CD300LG,CLDN5,CNN1,COL6A6,DST,FHL1,GPRASP1,HAS3,ITIH5,LRRN4CL,NOTCH1,NUSAP1,OXTR,PCLAF,PGM5,PRRG3,RRM2,SCN3A,SORD,TPD52,UBE2C,UBE2T,VEGFD	34
Intraabdominal organ tumor	4.17e-06	ABCA9,ABCB5,ADAMTS5,ANKRD29,ARHGAP20,ASPA,ATAD2,AURKA,CAVIN2,CCDC178,CCDC8,CCNB1,CD300LG,CLDN5,CNN1,COL6A6,DST,FHL1,GPRASP1,H2BC5,HAS3,INSYN2B,ITIH5,LRFN5,LRRN4CL,MME,NOTCH1,NUSAP1,OXTR,PCLAF,PGM5,PMAIP1,PRRG3,RRM2,SCN3A,SCN4B,SORD,TPD52,TUBB2B,UBE2C,UBE2T,VEGFD	42
Uterine cancer	4.75e-06	ABCA9,ABCB5,ADAMTS5,ASPA,ATAD2,AURKA,CCDC178,CCDC8,CCNB1,CLDN5,CNN1,COL6A6,DST,FHL1,GPRASP1,H2BC5,INSYN2B,ITIH5,NOTCH1,NUSAP1,PGM5,PMAIP1,PRRG3,RRM2,SCN3A,TUBB2B,UBE2C,VEGFD	28
Endometrial cancer	5.08e-06	ABCA9,ABCB5,ADAMTS5,ASPA,ATAD2,AURKA,CCDC178,CCDC8,CCNB1,CLDN5,CNN1,COL6A6,DST,FHL1,GPRASP1,H2BC5,INSYN2B,ITIH5,NOTCH1,NUSAP1,PGM5,PMAIP1,PRRG3,SCN3A,TUBB2B,UBE2C,VEGFD	27
Abdominal cancer	5.13e-06	ABCA9,ABCB5,ADAMTS5,ANKRD29,ARHGAP20,ASPA,ATAD2,AURKA,CAVIN2,CCDC178,CCDC8,CCNB1,CD300LG,CLDN5,CNN1,COL6A6,DST,FHL1,GPRASP1,H2BC5,HAS3,INSYN2B,ITIH5,LRFN5,LRRN4CL,MME,NOTCH1,NUSAP1,OXTR,PCLAF,PGM5,PMAIP1,PRRG3,RRM2,SCN3A,SCN4B,SORD,TPD52,TUBB2B,UBE2C,UBE2T,VEGFD	42
Serous adenocarcinoma	5.74e-06	AURKA,CCNB1,CLDN5,CNN1,DST,GPRASP1,H2BC5,NOTCH1,PGM5,PMAIP1,RRM2,UBE2C	12
Adenocarcinoma	5.82e-06	ABCA9,ABCB5,ADAMTS5,ANKRD29,ARHGAP20,ASPA,ATAD2,AURKA,CAVIN2,CCDC178,CCDC8,CCNB1,CD300LG,CLDN5,CNN1,COL6A6,DST,FHL1,GPRASP1,H2BC5,HAS3,INSYN2B,ITIH5,LRFN5,LRRN4CL,MME,NOTCH1,NUSAP1,OXTR,PCLAF,PGM5,PMAIP1,PRRG3,RRM2,SCN3A,SCN4B,TPD52,TUBB2B,UBE2C,UBE2T,VEGFD	41
Digestive system cancer	7.41e-06	ABCA9,ABCB5,ADAMTS5,ANKRD29,ARHGAP20,ATAD2,AURKA,CAVIN2,CCDC178,CCDC8,CCNB1,CD300LG,CLDN5,CNN1,COL6A6,DST,FHL1,GPRASP1,H2BC5,HAS3,INSYN2B,ITIH5,LRFN5,LRRN4CL,MME,NOTCH1,NUSAP1,OXTR,PCLAF,PGM5,PMAIP1,PRRG3,RRM2,SCN3A,SCN4B,SORD,TPD52,TUBB2B,UBE2C,UBE2T,VEGFD	41
Female genital tract cancer	7.79e-06	ABCA9,ABCB5,ADAMTS5,ASPA,ATAD2,AURKA,CCDC178,CCDC8,CCNB1,CLDN5,CNN1,COL6A6,DST,FHL1,GPRASP1,H2BC5,INSYN2B,ITIH5,NOTCH1,NUSAP1,PCLAF,PGM5,PMAIP1,PRRG3,RRM2,SCN3A,TPD52,TUBB2B,UBE2C,VEGFD	30
Benign solid tumor	8.69e-06	ADAMTS5,CAVIN2,CCNB1,CLDN5,DST,ITIH5,NOTCH1,NUSAP1,OXTR,PGM5,RRM2,SORD	12
Central nervous system solid tumor	1.7e-05	ABCB5,ADAMTS5,ANKRD29,ARHGAP20,ASPA,ATAD2,AURKA,CAVIN2,CCDC178,CCDC8,CCNB1,CD300LG,CNN1,COL6A6,DST,FHL1,GPRASP1,HAS3,ITIH5,LRRN4CL,NOTCH1,NUSAP1,OXTR,PCLAF,PGM5,PRRG3,RRM2,SCN3A,SORD,TPD52,UBE2C,UBE2T,VEGFD	33
Incidence of tumor	1.74e-05	ABCA9,ABCB5,ADAMTS5,ARHGAP20,ASPA,ATAD2,AURKA,CAVIN2,CCDC178,CCDC8,CCNB1,CD300LG,CLDN5,CNN1,COL6A6,DST,FHL1,GPRASP1,H2BC5,INSYN2B,ITIH5,LRFN5,LRRN4CL,MME,NOTCH1,NUSAP1,PCLAF,PGM5,PMAIP1,PRRG3,RRM2,SCN3A,SCN4B,SORD,TPD52,TUBB2B,UBE2C,VEGFD	38
Large intestine neoplasm	1.81e-05	ABCA9,ABCB5,ADAMTS5,ANKRD29,ARHGAP20,ATAD2,AURKA,CAVIN2,CCDC178,CCDC8,CCNB1,CD300LG,CLDN5,CNN1,COL6A6,DST,FHL1,H2BC5,HAS3,INSYN2B,ITIH5,LRFN5,LRRN4CL,MME,NOTCH1,NUSAP1,OXTR,PCLAF,PGM5,PMAIP1,PRRG3,RRM2,SCN3A,SCN4B,SORD,TUBB2B,UBE2C,VEGFD	38
Abdominal carcinoma	2.29e-05	ABCA9,ABCB5,ADAMTS5,ANKRD29,ARHGAP20,ASPA,ATAD2,AURKA,CAVIN2,CCDC178,CCDC8,CCNB1,CD300LG,CLDN5,CNN1,COL6A6,DST,FHL1,GPRASP1,H2BC5,HAS3,INSYN2B,ITIH5,LRFN5,LRRN4CL,MME,NOTCH1,NUSAP1,OXTR,PGM5,PMAIP1,PRRG3,RRM2,SCN3A,SCN4B,SORD,TPD52,TUBB2B,UBE2C,UBE2T,VEGFD	41
Genitourinary adenocarcinoma	2.41e-05	ABCA9,ABCB5,ADAMTS5,ARHGAP20,ASPA,ATAD2,AURKA,CAVIN2,CCDC178,CCDC8,CCNB1,CLDN5,CNN1,COL6A6,DST,GPRASP1,H2BC5,HAS3,INSYN2B,ITIH5,MME,NOTCH1,NUSAP1,PGM5,PMAIP1,PRRG3,RRM2,SCN3A,TPD52,TUBB2B,UBE2C,UBE2T,VEGFD	33
Tumorigenesis of epithelial neoplasm	2.7e-05	ABCA9,ABCB5,ADAMTS5,ARHGAP20,ASPA,ATAD2,AURKA,CAVIN2,CCDC178,CCDC8,CCNB1,CD300LG,CLDN5,CNN1,COL6A6,DST,FHL1,GPRASP1,H2BC5,INSYN2B,ITIH5,LRFN5,LRRN4CL,MME,NOTCH1,NUSAP1,PCLAF,PGM5,PRRG3,RRM2,SCN3A,SCN4B,SORD,TPD52,TUBB2B,UBE2C,VEGFD	37
Head and neck cancer	2.71e-05	ABCA9,ABCB5,ADAMTS5,ANKRD29,ARHGAP20,ASPA,ATAD2,AURKA,CAVIN2,CCDC178,CCDC8,CCNB1,CLDN5,CNN1,COL6A6,DST,FHL1,GPRASP1,H2BC5,HAS3,INSYN2B,ITIH5,LRFN5,LRRN4CL,MME,NOTCH1,NUSAP1,OXTR,PGM5,PRRG3,RRM2,SCN3A,SCN4B,SORD,TPD52,TUBB2B,UBE2C,UBE2T,VEGFD	39
Hematological or lymphatic system tumor	3.09e-05	ADAMTS5,ARHGAP20,AURKA,CAVIN2,CCDC178,CCDC8,CCNB1,CLDN5,COL6A6,DST,FHL1,GPRASP1,ITIH5,MME,NOTCH1,NUSAP1,PCLAF,PGM5,PMAIP1,PRRG3,RRM2,SORD,UBE2C,VEGFD	24
Central nervous system cancer	3.31e-05	ABCB5,ADAMTS5,ARHGAP20,ASPA,ATAD2,AURKA,CAVIN2,CCDC178,CCDC8,CCNB1,CD300LG,CLDN5,CNN1,COL6A6,DST,FHL1,GPRASP1,ITIH5,LRRN4CL,NOTCH1,NUSAP1,OXTR,PCLAF,PGM5,PRRG3,RRM2,SCN3A,SORD,TPD52,UBE2C,UBE2T,VEGFD	32
Smooth muscle tumor	3.49e-05	CAVIN2,CLDN5,DST,NOTCH1,OXTR,RRM2,UBE2C	7
Colorectal cancer	3.52e-05	ABCA9,ABCB5,ADAMTS5,ARHGAP20,ATAD2,AURKA,CAVIN2,CCDC178,CD300LG,COL6A6,DST,FHL1,H2BC5,INSYN2B,ITIH5,LRRN4CL,MME,NOTCH1,NUSAP1,PCLAF,PGM5,PMAIP1,PRRG3,RRM2,SCN3A,SCN4B,TUBB2B,UBE2C,VEGFD	29
Colon tumor	3.61e-05	ABCA9,ABCB5,ADAMTS5,ARHGAP20,ATAD2,AURKA,CAVIN2,CCDC178,CD300LG,CNN1,COL6A6,DST,FHL1,H2BC5,INSYN2B,LRRN4CL,MME,NOTCH1,NUSAP1,PCLAF,PGM5,PMAIP1,PRRG3,RRM2,SCN3A,SCN4B,TUBB2B	27
Frequency of tumor	3.68e-05	ABCA9,ABCB5,ADAMTS5,ARHGAP20,ASPA,ATAD2,AURKA,CAVIN2,CCDC178,CCDC8,CCNB1,CD300LG,CLDN5,CNN1,COL6A6,DST,FHL1,GPRASP1,H2BC5,INSYN2B,ITIH5,LRFN5,LRRN4CL,MME,NOTCH1,NUSAP1,PCLAF,PGM5,PRRG3,RRM2,SCN3A,SCN4B,SORD,TPD52,TUBB2B,UBE2C,VEGFD	37
Head and neck tumor	3.97e-05	ABCA9,ABCB5,ADAMTS5,ANKRD29,ARHGAP20,ASPA,ATAD2,AURKA,CAVIN2,CCDC178,CCDC8,CCNB1,CD300LG,CLDN5,CNN1,COL6A6,DST,FHL1,GPRASP1,H2BC5,HAS3,INSYN2B,ITIH5,LRFN5,LRRN4CL,MME,NOTCH1,NUSAP1,OXTR,PGM5,PRRG3,RRM2,SCN3A,SCN4B,SORD,TPD52,TUBB2B,UBE2C,UBE2T,VEGFD	40
Lymphoproliferative disorder of the skin	4.09e-05	AURKA,CAVIN2,DST,MME,NOTCH1,RRM2,VEGFD	7
Head and neck carcinoma	4.63e-05	ABCA9,ABCB5,ADAMTS5,ANKRD29,ARHGAP20,ASPA,ATAD2,AURKA,CCDC178,CCDC8,CCNB1,CLDN5,CNN1,COL6A6,DST,FHL1,GPRASP1,H2BC5,HAS3,INSYN2B,ITIH5,LRFN5,LRRN4CL,MME,NOTCH1,NUSAP1,OXTR,PGM5,PRRG3,RRM2,SCN3A,SCN4B,SORD,TPD52,TUBB2B,UBE2C,UBE2T,VEGFD	38
Carcinoma	4.89e-05	ABCA9,ABCB5,ADAMTS5,ANKRD29,ARHGAP20,ASPA,ATAD2,AURKA,CAVIN2,CCDC178,CCDC8,CCNB1,CD300LG,CLDN5,CNN1,COL6A6,DST,FHL1,GPRASP1,H2BC5,HAS3,INSYN2B,ITIH5,LRFN5,LRRN4CL,MME,NOTCH1,NUSAP1,OXTR,PCLAF,PGM5,PMAIP1,PRRG3,RRM2,SCN3A,SCN4B,SORD,TPD52,TUBB2B,UBE2C,UBE2T,VEGFD	42
Genitourinary carcinoma	5.04e-05	ABCA9,ABCB5,ADAMTS5,ARHGAP20,ASPA,ATAD2,AURKA,CAVIN2,CCDC178,CCDC8,CCNB1,CD300LG,CLDN5,CNN1,COL6A6,DST,GPRASP1,H2BC5,HAS3,INSYN2B,ITIH5,LRFN5,MME,NOTCH1,NUSAP1,PGM5,PMAIP1,PRRG3,RRM2,SCN3A,TPD52,TUBB2B,UBE2C,UBE2T,VEGFD	35
Extrapancreatic malignant tumor	5.16e-05	ABCA9,ABCB5,ADAMTS5,ANKRD29,ARHGAP20,ASPA,ATAD2,AURKA,CAVIN2,CCDC178,CCDC8,CCNB1,CD300LG,CLDN5,CNN1,COL6A6,DST,FHL1,GPRASP1,H2BC5,HAS3,INSYN2B,ITIH5,LRFN5,LRRN4CL,MME,NOTCH1,NUSAP1,OXTR,PCLAF,PGM5,PMAIP1,PRRG3,RRM2,SCN3A,SCN4B,SORD,TPD52,TUBB2B,UBE2C,UBE2T,VEGFD	42
Pelvic adenocarcinoma	5.37e-05	ABCA9,ABCB5,ADAMTS5,ARHGAP20,ASPA,ATAD2,AURKA,CAVIN2,CCDC178,CCDC8,CCNB1,CLDN5,CNN1,COL6A6,DST,GPRASP1,H2BC5,HAS3,INSYN2B,ITIH5,NOTCH1,NUSAP1,PGM5,PMAIP1,PRRG3,RRM2,SCN3A,TUBB2B,UBE2C,UBE2T,VEGFD	31
Uterine carcinoma	6.32e-05	ABCA9,ABCB5,ASPA,ATAD2,AURKA,CCDC178,CCDC8,CCNB1,CLDN5,CNN1,COL6A6,DST,GPRASP1,H2BC5,INSYN2B,ITIH5,NOTCH1,NUSAP1,PGM5,PMAIP1,RRM2,SCN3A,TUBB2B,UBE2C,VEGFD	25
HER2 negative hormone receptor negative breast cancer	6.43e-05	ADAMTS5,ANKRD29,CCNB1,RRM2,SCN4B,SORD	6
Generation of tumor	7.15e-05	ABCA9,ABCB5,ADAMTS5,ARHGAP20,ASPA,ATAD2,AURKA,CAVIN2,CCDC178,CCDC8,CCNB1,CD300LG,CLDN5,CNN1,COL6A6,DST,FHL1,GPRASP1,H2BC5,HAS3,INSYN2B,ITIH5,LRFN5,LRRN4CL,MME,NOTCH1,NUSAP1,OXTR,PCLAF,PGM5,PRRG3,RRM2,SCN3A,SCN4B,TPD52,TUBB2B,UBE2C,UBE2T,VEGFD	39
Hematologic cancer	7.2e-05	ADAMTS5,ARHGAP20,AURKA,CAVIN2,CCDC178,CCNB1,CLDN5,COL6A6,DST,FHL1,GPRASP1,ITIH5,MME,NOTCH1,NUSAP1,PCLAF,PGM5,PMAIP1,PRRG3,RRM2,SORD,UBE2C,VEGFD	23
Genital carcinoma	8.99e-05	ABCA9,ABCB5,ADAMTS5,ARHGAP20,ASPA,ATAD2,AURKA,CAVIN2,CCDC178,CCDC8,CCNB1,CLDN5,CNN1,COL6A6,DST,GPRASP1,H2BC5,HAS3,INSYN2B,ITIH5,NOTCH1,NUSAP1,PGM5,PMAIP1,PRRG3,RRM2,SCN3A,TUBB2B,UBE2C,UBE2T,VEGFD	31
Breast carcinoma	9.42e-05	ABCA9,ADAMTS5,ARHGAP20,ATAD2,AURKA,CCNB1,CD300LG,CNN1,COL6A6,DST,GPRASP1,NOTCH1,NUSAP1,PRRG3,RRM2,TPD52,UBE2C,VEGFD	18
Development of carcinoma	9.54e-05	ABCA9,ABCB5,ADAMTS5,ARHGAP20,ASPA,ATAD2,AURKA,CAVIN2,CCDC178,CCDC8,CCNB1,CD300LG,CLDN5,CNN1,COL6A6,DST,FHL1,GPRASP1,H2BC5,INSYN2B,ITIH5,LRFN5,LRRN4CL,MME,NOTCH1,NUSAP1,PCLAF,PGM5,PRRG3,RRM2,SCN3A,SCN4B,TPD52,TUBB2B,UBE2C,VEGFD	36
Colon cancer	0.000103	ABCA9,ABCB5,ADAMTS5,ARHGAP20,ATAD2,AURKA,CAVIN2,CCDC178,CD300LG,COL6A6,DST,FHL1,H2BC5,INSYN2B,LRRN4CL,MME,NOTCH1,NUSAP1,PCLAF,PGM5,PMAIP1,PRRG3,RRM2,SCN3A,SCN4B,TUBB2B	26
B-cell lymphoma	0.000105	AURKA,DST,FHL1,ITIH5,MME,NOTCH1,NUSAP1,PCLAF,PMAIP1,RRM2,UBE2C	11
Muscle tumor	0.000113	CAVIN2,CLDN5,DST,ITIH5,MME,NOTCH1,OXTR,RRM2,UBE2C	9
Proliferation of pancreatic cancer cell lines	0.000129	AURKA,NOTCH1,PCLAF,RRM2,UBE2C	5
Glioma	0.00013	ABCB5,ADAMTS5,ARHGAP20,ASPA,ATAD2,AURKA,CAVIN2,CCDC178,CCDC8,CCNB1,CD300LG,CNN1,COL6A6,DST,FHL1,GPRASP1,HAS3,ITIH5,LRRN4CL,NOTCH1,NUSAP1,OXTR,PCLAF,PGM5,PRRG3,RRM2,SCN3A,TPD52,UBE2C,UBE2T,VEGFD	31
Ductal carcinoma	0.000132	ABCA9,ADAMTS5,ANKRD29,ARHGAP20,CCDC178,CCDC8,CNN1,COL6A6,DST,FHL1,GPRASP1,INSYN2B,ITIH5,MME,NOTCH1,NUSAP1,RRM2,TPD52,UBE2C,VEGFD	20
Hepatocellular carcinoma	0.000134	ATAD2,AURKA,CCDC178,CCNB1,COL6A6,DST,MME,NOTCH1,NUSAP1,RRM2,SORD,UBE2C,UBE2T	13
Lymphoma	0.000157	AURKA,CAVIN2,DST,FHL1,ITIH5,MME,NOTCH1,NUSAP1,PCLAF,PMAIP1,RRM2,SORD,UBE2C,VEGFD	14
Abdominal adenocarcinoma	0.000159	ABCA9,ABCB5,ADAMTS5,ANKRD29,ARHGAP20,ASPA,ATAD2,AURKA,CAVIN2,CCDC178,CCDC8,CCNB1,CD300LG,CLDN5,CNN1,COL6A6,DST,FHL1,GPRASP1,H2BC5,HAS3,INSYN2B,ITIH5,LRFN5,LRRN4CL,MME,NOTCH1,NUSAP1,OXTR,PGM5,PMAIP1,PRRG3,RRM2,SCN3A,SCN4B,TUBB2B,UBE2C,UBE2T,VEGFD	39
Post-transplant lymphoproliferative disorder	0.000171	MME,NOTCH1,RRM2	3
Pelvic carcinoma	0.000178	ABCA9,ABCB5,ADAMTS5,ARHGAP20,ASPA,ATAD2,AURKA,CAVIN2,CCDC178,CCDC8,CCNB1,CLDN5,CNN1,COL6A6,DST,GPRASP1,H2BC5,HAS3,INSYN2B,ITIH5,LRFN5,NOTCH1,NUSAP1,PGM5,PMAIP1,PRRG3,RRM2,SCN3A,TUBB2B,UBE2C,UBE2T,VEGFD	32
Lymphatic system tumor	0.000195	ARHGAP20,AURKA,CAVIN2,CCDC178,CCDC8,CCNB1,DST,FHL1,ITIH5,MME,NOTCH1,NUSAP1,PCLAF,PMAIP1,PRRG3,RRM2,SORD,UBE2C,VEGFD	19
Cancer of secretory structure	0.000198	ABCA9,ABCB5,ADAMTS5,ANKRD29,ARHGAP20,ASPA,ATAD2,AURKA,CAVIN2,CCDC178,CCDC8,CCNB1,CLDN5,CNN1,COL6A6,DST,FHL1,GPRASP1,HAS3,INSYN2B,ITIH5,LRRN4CL,MME,NOTCH1,NUSAP1,OXTR,PCLAF,PGM5,PMAIP1,PRRG3,RRM2,SCN3A,SCN4B,SORD,TPD52,TUBB2B,UBE2C,UBE2T	38
Nicotine dependence	0.000208	OXTR,SCN3A,SCN4B	3
Extracranial solid tumor	0.000212	ABCA9,ABCB5,ADAMTS5,ANKRD29,ARHGAP20,ASPA,ATAD2,AURKA,CAVIN2,CCDC178,CCDC8,CCNB1,CD300LG,CLDN5,CNN1,COL6A6,DST,FHL1,GPRASP1,H2BC5,HAS3,INSYN2B,ITIH5,LRFN5,LRRN4CL,MME,NOTCH1,NUSAP1,OXTR,PCLAF,PGM5,PMAIP1,PRRG3,RRM2,SCN3A,SCN4B,SORD,TPD52,TUBB2B,UBE2C,UBE2T,VEGFD	42
Development of benign tumor	0.000232	ADAMTS5,CCNB1,ITIH5,NOTCH1,NUSAP1,PGM5,RRM2,SORD	8
Breast or ovarian carcinoma	0.000246	ABCA9,ADAMTS5,ARHGAP20,ATAD2,AURKA,CCNB1,CD300LG,CNN1,COL6A6,DST,GPRASP1,H2BC5,NOTCH1,NUSAP1,PGM5,PRRG3,RRM2,SCN3A,TPD52,UBE2C,VEGFD	21
Neck neoplasm	0.000252	ABCA9,ABCB5,ADAMTS5,ANKRD29,ARHGAP20,ASPA,ATAD2,AURKA,CCDC178,CCDC8,CLDN5,CNN1,COL6A6,DST,FHL1,GPRASP1,HAS3,INSYN2B,ITIH5,LRFN5,LRRN4CL,MME,NOTCH1,NUSAP1,OXTR,PGM5,PRRG3,RRM2,SCN3A,SCN4B,SORD,TPD52,TUBB2B,UBE2C,UBE2T,VEGFD	36
Myeloid or lymphoid neoplasm	0.000274	ADAMTS5,ARHGAP20,AURKA,CAVIN2,CCDC178,CCNB1,COL6A6,DST,FHL1,GPRASP1,ITIH5,MME,NOTCH1,NUSAP1,PCLAF,PGM5,PMAIP1,PRRG3,RRM2,SORD,UBE2C,VEGFD	22
Glioma cancer	0.000283	ABCB5,ADAMTS5,ARHGAP20,ASPA,ATAD2,AURKA,CAVIN2,CCDC178,CCDC8,CCNB1,CD300LG,CNN1,COL6A6,DST,FHL1,GPRASP1,ITIH5,LRRN4CL,NOTCH1,NUSAP1,OXTR,PCLAF,PGM5,PRRG3,RRM2,SCN3A,TPD52,UBE2C,UBE2T,VEGFD	30
Pancreaticobiliary cancer	0.000289	ABCA9,ADAMTS5,ANKRD29,CCDC178,CCDC8,CNN1,COL6A6,DST,FHL1,GPRASP1,INSYN2B,ITIH5,MME,NOTCH1,NUSAP1,PCLAF,PMAIP1,RRM2,SCN3A	19
Tauopathy	0.000318	ATAD2,CCNB1,CLDN5,CNN1,MME,NOTCH1,SCN3A,SCN4B	8
Adhesion of skin cell lines	0.000325	NOTCH1,VEGFD	2
Adenoma	0.00034	CCNB1,ITIH5,NOTCH1,NUSAP1,PGM5,RRM2,SORD	7
Malignant neoplasm of large intestine	0.000358	ABCA9,ABCB5,ADAMTS5,ANKRD29,ARHGAP20,ATAD2,AURKA,CAVIN2,CCDC178,CCDC8,CCNB1,CD300LG,CLDN5,COL6A6,DST,FHL1,H2BC5,HAS3,INSYN2B,ITIH5,LRFN5,LRRN4CL,MME,NOTCH1,NUSAP1,OXTR,PCLAF,PGM5,PMAIP1,PRRG3,RRM2,SCN3A,SCN4B,TUBB2B,UBE2C,VEGFD	36
Female genital tract adenocarcinoma	0.000373	ABCA9,ABCB5,ASPA,ATAD2,AURKA,CCDC178,CCDC8,CCNB1,CLDN5,CNN1,COL6A6,DST,GPRASP1,H2BC5,INSYN2B,ITIH5,NOTCH1,NUSAP1,PGM5,PMAIP1,RRM2,SCN3A,TUBB2B,UBE2C,VEGFD	25
Relapsed chronic lymphocytic leukemia	0.000421	NOTCH1,RRM2	2
Modification of microtubules	0.000421	AURKA,DST	2
Gastric cancer	0.000422	ABCB5,ADAMTS5,ARHGAP20,ATAD2,AURKA,CCDC178,CLDN5,CNN1,DST,GPRASP1,INSYN2B,ITIH5,LRFN5,LRRN4CL,MME,NOTCH1,PGM5,RRM2,TPD52,UBE2C,UBE2T	21
Malignant neoplasm of male genital organ	0.000431	ABCB5,ADAMTS5,ARHGAP20,ATAD2,AURKA,CAVIN2,CCDC178,CCDC8,CCNB1,COL6A6,DST,HAS3,ITIH5,MME,NOTCH1,NUSAP1,PGM5,PRRG3,RRM2,SCN3A,UBE2T	21
Lung adenocarcinoma	0.000441	ABCB5,ADAMTS5,ATAD2,AURKA,CCDC178,CCNB1,DST,FHL1,LRFN5,NOTCH1,NUSAP1,PCLAF,RRM2,UBE2C	14
Burkitt lymphoma	0.000458	MME,NOTCH1,PMAIP1,RRM2	4
Myoclonic dystonia	0.000473	SCN3A,SCN4B	2
Prostatic carcinoma	0.000512	ABCB5,ADAMTS5,ARHGAP20,ATAD2,CAVIN2,CCDC178,CCDC8,CCNB1,COL6A6,DST,HAS3,ITIH5,NOTCH1,NUSAP1,PGM5,PRRG3,RRM2,SCN3A,UBE2T	19
Splenic cancer	0.000513	MME,NOTCH1,RRM2	3
Lymphocytic cancer	0.000518	ARHGAP20,AURKA,CAVIN2,CCDC178,CCNB1,DST,FHL1,ITIH5,MME,NOTCH1,NUSAP1,PCLAF,PMAIP1,PRRG3,RRM2,SORD,UBE2C,VEGFD	18
Malignant lymphocytic neoplasm	0.000518	ARHGAP20,AURKA,CAVIN2,CCDC178,CCNB1,DST,FHL1,ITIH5,MME,NOTCH1,NUSAP1,PCLAF,PMAIP1,PRRG3,RRM2,SORD,UBE2C,VEGFD	18
Abnormal morphology of mitotic spindle	0.000528	AURKA,NUSAP1	2
High grade astrocytoma	0.000528	ABCB5,ADAMTS5,ASPA,ATAD2,AURKA,CAVIN2,CCDC178,CCDC8,CCNB1,CD300LG,COL6A6,DST,FHL1,GPRASP1,ITIH5,NOTCH1,PCLAF,PGM5,PRRG3,RRM2,SCN3A,TPD52,UBE2C,UBE2T,VEGFD	25
Lymphoreticular neoplasm	0.000543	ADAMTS5,AURKA,CAVIN2,COL6A6,DST,FHL1,GPRASP1,ITIH5,MME,NOTCH1,NUSAP1,PCLAF,PGM5,PMAIP1,RRM2,SORD,UBE2C,VEGFD	18
Non-Hodgkin cutaneous lymphoma	0.00056	AURKA,MME,NOTCH1,RRM2	4
B cell cancer	0.000567	AURKA,CAVIN2,CCNB1,DST,FHL1,ITIH5,MME,NOTCH1,NUSAP1,PCLAF,PMAIP1,PRRG3,RRM2,UBE2C	14
Development of digestive organ tumor	0.00061	ABCA9,ABCB5,ADAMTS5,ARHGAP20,ATAD2,AURKA,CAVIN2,CCDC178,CD300LG,CLDN5,CNN1,COL6A6,DST,FHL1,GPRASP1,INSYN2B,ITIH5,LRFN5,LRRN4CL,MME,NOTCH1,NUSAP1,PGM5,PRRG3,SCN3A,SCN4B,TPD52,TUBB2B,UBE2C	29
Spinocerebellar ataxia type 2	0.000646	SCN3A,SCN4B	2
Gonadal tumor	0.000694	ATAD2,CCNB1,COL6A6,DST,H2BC5,MME,NOTCH1,NUSAP1,PCLAF,PGM5,RRM2,SCN3A,TPD52,UBE2C	14
Neoplasia of cells	0.000724	ADAMTS5,ATAD2,AURKA,CAVIN2,CCDC178,CCNB1,CD300LG,CNN1,COL6A6,DST,FHL1,GPRASP1,H2BC5,ITIH5,LRFN5,MME,NOTCH1,NUSAP1,PCLAF,PGM5,PMAIP1,PRRG3,RRM2,SCN3A,SORD,TPD52,UBE2C,VEGFD	28
Brain tumor	0.00081	ABCB5,ADAMTS5,ARHGAP20,ASPA,ATAD2,AURKA,CAVIN2,CCDC178,CCDC8,CCNB1,CD300LG,CNN1,COL6A6,DST,FHL1,HAS3,ITIH5,LRRN4CL,NOTCH1,NUSAP1,OXTR,PGM5,PRRG3,RRM2,SCN3A,TPD52,UBE2C,UBE2T,VEGFD	29
Cytokinesis	0.000876	AURKA,CCNB1,NUSAP1,UBE2C	4
Diffuse small-cell lymphoma	0.000888	DST,FHL1,ITIH5,MME,NOTCH1,PMAIP1,RRM2	7
Autosomal dominant spinocerebellar ataxia	0.000888	MME,SCN3A,SCN4B	3
Pain threshold	0.000919	ADAMTS5,ASPA	2
Delay in mitosis of cervical cancer cell lines	0.000919	AURKA,CCNB1	2
Cervical spondylotic myelopathy	0.000919	SCN3A,SCN4B	2
Cell death of carcinoma cell lines	0.000943	AURKA,CCNB1,NOTCH1,PMAIP1,RRM2,UBE2C	6
Progressive hematopoietic disorder	0.000963	NOTCH1,RRM2,UBE2T	3
Arrest in interphase of carcinoma cell lines	0.000989	CCNB1,NOTCH1,PCLAF	3
Leiomyosarcoma	0.000989	NOTCH1,RRM2,UBE2C	3
Proliferation of pneumocytes	0.000995	CCNB1,NOTCH1	2
Cell viability of colorectal cancer cell lines	0.00101	CCNB1,NOTCH1,PMAIP1,RRM2	4
Prostate cancer	0.00101	ABCB5,ADAMTS5,ARHGAP20,ATAD2,AURKA,CAVIN2,CCDC178,CCDC8,CCNB1,COL6A6,DST,HAS3,ITIH5,NOTCH1,NUSAP1,PGM5,PRRG3,RRM2,SCN3A,UBE2T	20
Non-small cell lung carcinoma	0.00102	ABCB5,ADAMTS5,ATAD2,AURKA,CCDC178,CCNB1,DST,FHL1,H2BC5,LRFN5,NOTCH1,NUSAP1,PCLAF,RRM2,UBE2C,VEGFD	16
Bladder cancer	0.00105	ABCB5,ANKRD29,ATAD2,CCDC8,DST,FHL1,H2BC5,LRFN5,NOTCH1,NUSAP1,RRM2,SCN3A,UBE2C	13
Cognitive impairment	0.00106	ASPA,CCDC8,CCNB1,GPRASP1,MME,SCN3A,SCN4B,TUBB2B,VEGFD	9
Embryonal tumor	0.00108	ADAMTS5,ASPA,AURKA,GPRASP1,NOTCH1,PCLAF,RRM2,UBE2C	8
Invasive breast carcinoma	0.00109	ADAMTS5,ATAD2,CNN1,DST,NUSAP1,RRM2	6
Bile duct carcinoma	0.00109	ADAMTS5,CCDC178,CNN1,DST,MME,NOTCH1,NUSAP1,RRM2	8
Ovarian cancer	0.0011	ATAD2,CCNB1,COL6A6,DST,H2BC5,NOTCH1,NUSAP1,PCLAF,PGM5,RRM2,SCN3A,TPD52,UBE2C	13
Pancreatobiliary tumor	0.00113	ABCA9,ADAMTS5,ANKRD29,CCDC178,CCDC8,CNN1,COL6A6,DST,FHL1,GPRASP1,INSYN2B,ITIH5,MME,NOTCH1,NUSAP1,PCLAF,PMAIP1,RRM2,SCN3A	19
Hypertension	0.0012	ANKRD29,CCDC8,FHL1,MME,NOTCH1,OXTR,PGM5,SCN4B	8
Malignant neoplasm of retroperitoneum	0.0012	ABCA9,ADAMTS5,ANKRD29,AURKA,CCDC178,CCDC8,COL6A6,DST,FHL1,GPRASP1,INSYN2B,ITIH5,MME,NOTCH1,NUSAP1,PCLAF,PMAIP1,RRM2,SCN3A	19
Discomfort	0.00121	FHL1,OXTR,RRM2,SCN3A,SCN4B	5
Apoptosis of sarcoma cell lines	0.00121	ATAD2,AURKA,CCDC8,PMAIP1	4
Glioblastoma	0.00124	ADAMTS5,ASPA,GPRASP1,PCLAF,RRM2,UBE2C	6
Uterine smooth muscle tumor	0.00124	CAVIN2,CLDN5,DST,NOTCH1,RRM2	5
Tumorigenesis of lymphocytes	0.00126	AURKA,CAVIN2,CCNB1,DST,FHL1,ITIH5,MME,NOTCH1,NUSAP1,PCLAF,PMAIP1,PRRG3,RRM2,SORD,UBE2C,VEGFD	16
Neoplasia of blood cells	0.00127	ADAMTS5,AURKA,CAVIN2,CCNB1,COL6A6,DST,FHL1,GPRASP1,ITIH5,MME,NOTCH1,NUSAP1,PCLAF,PGM5,PMAIP1,PRRG3,RRM2,SORD,UBE2C,VEGFD	20
Growth of tumor	0.0013	ABCB5,AURKA,FHL1,MME,NOTCH1,RRM2,TPD52,UBE2C,UBE2T,VEGFD	10
Apoptosis of pneumocytes	0.00133	NOTCH1,PMAIP1	2
Growth of liver tumor	0.0014	MME,NOTCH1,RRM2	3
Myosarcoma	0.00142	DST,ITIH5,MME,NOTCH1,RRM2,UBE2C	6
Progressive neurological disorder	0.00144	ATAD2,CCNB1,CLDN5,CNN1,MME,NOTCH1,RRM2,SCN3A,SCN4B,TUBB2B	10
Mature B cell malignant tumor	0.00149	AURKA,CAVIN2,CCNB1,DST,FHL1,ITIH5,MME,NOTCH1,PMAIP1,RRM2	10
Apoptosis of rhabdomyosarcoma cell lines	0.00151	AURKA,PMAIP1	2
Multiple system atrophy	0.00151	SCN3A,SCN4B	2
Refractory peripheral T-cell lymphoma	0.0016	AURKA,RRM2	2
Relapsed peripheral T-cell lymphoma	0.0016	AURKA,RRM2	2
Progressive malignant lymphatic system neoplasm	0.0016	NOTCH1,RRM2	2
Cell proliferation of tumor cell lines	0.00162	ABCB5,ADAMTS5,ATAD2,AURKA,CCNB1,CNN1,FHL1,HAS3,NOTCH1,OXTR,PCLAF,RRM2,TPD52,UBE2C	14
Mixed neoplasia	0.00164	ATAD2,COL6A6,DST,ITIH5,NOTCH1,NUSAP1,PGM5,PRRG3,RRM2,SCN3A,VEGFD	11
Progressive encephalopathy	0.00165	ATAD2,CCNB1,CLDN5,CNN1,MME,NOTCH1,SCN3A,SCN4B,TUBB2B	9
Bile duct adenocarcinoma	0.00166	ADAMTS5,DST,MME,NOTCH1,RRM2	5
Valvular regurgitation of mitral valve	0.0017	MME,NOTCH1	2
Mitotic index	0.0017	AURKA,NUSAP1	2
Pancreaticobiliary carcinoma	0.0017	ABCA9,ADAMTS5,ANKRD29,CCDC178,CCDC8,CNN1,COL6A6,DST,FHL1,GPRASP1,INSYN2B,ITIH5,MME,NOTCH1,NUSAP1,RRM2,SCN3A	17
Lysis of glioma cells	0.0018	MME	1
Apoptosis of rhabdoid cell lines	0.0018	AURKA	1
Commitment of multipotential hemopoietic progenitor cells	0.0018	NOTCH1	1
Childhood-onset x-linked reducing body myopathy	0.0018	FHL1	1
Generation of stromal cells	0.0018	NOTCH1	1
Delay in initiation of differentiation of multilineage progenitor cells	0.0018	NOTCH1	1
Autosomal recessive epidermolysis bullosa simplex type 2	0.0018	DST	1
Hereditary T lymphoblastic leukemia/lymphoma	0.0018	NOTCH1	1
Metabolism by chronic lymphocytic leukemia cells	0.0018	NOTCH1	1
Metabolism of creatinine	0.0018	MME	1
Asymmetric polymicrogyria	0.0018	TUBB2B	1
Early infantile epileptic encephalopathy type 62	0.0018	SCN3A	1
Differentiation of colony forming unit megakaryocyte mixed cells	0.0018	NOTCH1	1
Quantity of UDP-glucuronic acid	0.0018	HAS3	1
Quantity of cortical bone	0.0018	NOTCH1	1
Dilation of collecting lymphatic vessel	0.0018	NOTCH1	1
Retraction of mesothelial cells	0.0018	CNN1	1
Modulation of microtubules	0.0018	AURKA	1
Hereditary sensory and autonomic neuropathy type VI	0.0018	DST	1
Binding of myosin filaments	0.0018	FHL1	1
Long-QT syndrome 10	0.0018	SCN4B	1
Quantity of RPE cells	0.0018	MME	1
Three m syndrome type 3	0.0018	CCDC8	1
Sorbitol dehydrogenase deficiency with peripheral neuropathy	0.0018	SORD	1
X-linked dominant scapuloperoneal myopathy	0.0018	FHL1	1
Curvature of vibrissae	0.0018	NOTCH1	1
Differentiation of pro-T3 thymocytes	0.0018	NOTCH1	1
Arrest in Gap 0-Gap 1 phase of sarcoma cell lines	0.0018	PCLAF	1
Coalignment of microfilaments	0.0018	DST	1
Mitotic catastrophe of rhabdoid cell lines	0.0018	AURKA	1
Grade 3 bladder carcinoma	0.0018	UBE2C	1
Early-onset reducing body X-linked severe myopathy	0.0018	FHL1	1
Cytostasis of carcinoma cells	0.0018	NOTCH1	1
Degeneration of oligodendrocytes	0.0018	ASPA	1
Detachment of fibroblasts	0.0018	VEGFD	1
Expansion of bone marrow cell lines	0.0018	NOTCH1	1
Delay in discharge of cells	0.0018	NOTCH1	1
Chronic lymphocytic leukemia subset 8	0.0018	NOTCH1	1
Hyperplasia of corneal epithelial tissue	0.0018	NOTCH1	1
X-linked Emery-Dreifuss muscular dystrophy type 6	0.0018	FHL1	1
Regulation of reactive astrocytes	0.0018	NOTCH1	1
Quantity of type-1 neural stem cells	0.0018	NOTCH1	1
Survival of rhabdoid cell lines	0.0018	AURKA	1
Rapidly progressive chronic lymphocytic leukemia	0.0018	NOTCH1	1
Dysmyelination of peripheral nervous system	0.0018	DST	1
Familial focal epilepsy with variable foci 4	0.0018	SCN3A	1
Lymphangiogenesis of tumor cells	0.0018	VEGFD	1
Accumulation of cell-associated matrix	0.0018	ADAMTS5	1
Accumulation of sorbitol	0.0018	SORD	1
Uruguay faciocardiomusculoskeletal syndrome	0.0018	FHL1	1
Social discrimination	0.0018	OXTR	1
Binding of caveolae	0.0018	CAVIN2	1
Coalignment of neurofilaments	0.0018	DST	1
Aneuploidy of colon carcinoma cells	0.0018	AURKA	1
Shone complex	0.0018	NOTCH1	1
Caspase-independent cell death of pancreatic cancer cell lines	0.0018	AURKA	1
Assembly of central spindle	0.0018	AURKA	1
Cell cycle progression of mesothelial cells	0.0018	NOTCH1	1
Arrest in G2 phase of esophageal cell lines	0.0018	CCNB1	1
Chronic inflammation of cornea	0.0018	NOTCH1	1
Fanconi anemia group T	0.0018	UBE2T	1
Susceptibility to colon cancer	0.0018	AURKA	1
Formation of sustentacular-like cells	0.0018	NOTCH1	1
Localization of Tip cells	0.0018	NOTCH1	1
Spinocerebellar ataxia type 43	0.0018	MME	1
Catabolism of sorbitol	0.0018	SORD	1
Production of tear	0.0018	NOTCH1	1
Adams-Oliver syndrome type 5	0.0018	NOTCH1	1
Pregnancy lactation-dependent neoplasm	0.0018	NOTCH1	1
Metabolism of acetate	0.0018	ASPA	1
Brain glioma	0.00183	ABCB5,ARHGAP20,ASPA,ATAD2,AURKA,CAVIN2,CCDC178,CCDC8,CCNB1,CD300LG,CNN1,COL6A6,DST,FHL1,HAS3,ITIH5,LRRN4CL,NOTCH1,NUSAP1,OXTR,PGM5,PRRG3,RRM2,SCN3A,TPD52,UBE2C,UBE2T,VEGFD	28
Colorectal adenoma	0.00183	CCNB1,ITIH5,PGM5,SORD	4
Upper airway cancer	0.00184	AURKA,CCNB1,COL6A6,ITIH5,LRFN5,NOTCH1,RRM2,SCN3A,VEGFD	9
Autism spectrum disorder or intellectual disability	0.00197	ASPA,CCDC8,DST,GPRASP1,OXTR,SCN3A,SCN4B,TUBB2B	8
Development of adenocarcinoma	0.002	ABCA9,ABCB5,ADAMTS5,ASPA,ATAD2,AURKA,CCDC178,CCDC8,CCNB1,COL6A6,DST,FHL1,GPRASP1,H2BC5,INSYN2B,ITIH5,LRFN5,MME,NOTCH1,NUSAP1,PCLAF,PGM5,RRM2,SCN3A,TUBB2B,UBE2C,VEGFD	27
Follicular lymphoma	0.00203	MME,NOTCH1,RRM2	3
Mitosis	0.00204	AURKA,CCDC8,CCNB1,NUSAP1,UBE2C,VEGFD	6
Lung squamous cell carcinoma	0.00207	ATAD2,AURKA,DST,H2BC5,LRFN5,NOTCH1,NUSAP1,RRM2	8
Growth of malignant tumor	0.00207	FHL1,MME,NOTCH1,RRM2,TPD52,UBE2C	6
Thyroid carcinoma	0.00208	ABCA9,ABCB5,ADAMTS5,ANKRD29,ARHGAP20,ASPA,ATAD2,AURKA,CCDC178,CCDC8,CLDN5,CNN1,COL6A6,DST,FHL1,GPRASP1,HAS3,INSYN2B,ITIH5,LRRN4CL,MME,NOTCH1,NUSAP1,OXTR,PGM5,PRRG3,RRM2,SCN3A,SCN4B,SORD,TPD52,TUBB2B,UBE2C,UBE2T	34
Alcoholism	0.00211	OXTR,SCN3A,SCN4B	3
Non-colon gastrointestinal cancer	0.00212	ABCB5,ADAMTS5,ARHGAP20,ATAD2,AURKA,CCDC178,CCNB1,CLDN5,CNN1,COL6A6,DST,GPRASP1,INSYN2B,ITIH5,LRFN5,LRRN4CL,MME,NOTCH1,PGM5,RRM2,SCN3A,TPD52,UBE2C,UBE2T	24
Endocrine carcinoma	0.00213	ABCA9,ABCB5,ADAMTS5,ANKRD29,ARHGAP20,ASPA,ATAD2,AURKA,CCDC178,CCDC8,CLDN5,CNN1,COL6A6,DST,FHL1,GPRASP1,HAS3,INSYN2B,ITIH5,LRFN5,LRRN4CL,MME,NOTCH1,NUSAP1,OXTR,PGM5,PRRG3,RRM2,SCN3A,SCN4B,SORD,TPD52,TUBB2B,UBE2C,UBE2T	35
Non-malignant disorder	0.0022	ADAMTS5,ANKRD29,CAVIN2,CCNB1,CLDN5,DST,ITIH5,NOTCH1,NUSAP1,OXTR,PGM5,RRM2,SORD	13
Preeclampsia	0.0022	ANKRD29,FHL1,MME,OXTR,PGM5,SCN4B	6
Proliferation of prostate cancer cell lines	0.00222	ATAD2,HAS3,NOTCH1,OXTR,TPD52	5
Degeneration of embryonic tissue	0.00223	AURKA,NOTCH1	2
Migration of skin cell lines	0.00223	NOTCH1,VEGFD	2
Unclassifiable B-cell lymphoma	0.00235	MME,RRM2	2
Upper gastrointestinal tract cancer	0.00242	ABCB5,ADAMTS5,ARHGAP20,ATAD2,AURKA,CCDC178,CCNB1,CLDN5,CNN1,COL6A6,DST,GPRASP1,INSYN2B,ITIH5,LRFN5,LRRN4CL,MME,NOTCH1,PGM5,RRM2,TPD52,UBE2C,UBE2T	23
Prostatic adenocarcinoma	0.00244	ABCB5,ADAMTS5,ARHGAP20,ATAD2,CAVIN2,CCDC178,CCNB1,COL6A6,DST,HAS3,ITIH5,NOTCH1,NUSAP1,PGM5,PRRG3,SCN3A,UBE2T	17
Colorectal adenocarcinoma	0.00246	ABCA9,ABCB5,ADAMTS5,ARHGAP20,ATAD2,AURKA,CAVIN2,CCDC178,CD300LG,COL6A6,DST,FHL1,INSYN2B,LRRN4CL,MME,NOTCH1,NUSAP1,PGM5,PRRG3,SCN3A,SCN4B,TUBB2B,UBE2C	23
Complex partial seizure	0.00247	SCN3A,SCN4B	2
Marfan syndrome	0.00247	CNN1,NOTCH1	2
Laryngeal squamous cell carcinoma	0.00247	AURKA,ITIH5,LRFN5,RRM2,SCN3A,VEGFD	6
Basal cell carcinoma	0.00259	ABCA9,ABCB5,ADAMTS5,ARHGAP20,AURKA,CCDC178,CD300LG,COL6A6,DST,ITIH5,LRFN5,LRRN4CL,NOTCH1,NUSAP1,PGM5,SCN3A	16
Uterine corpus cancer	0.00266	H2BC5,NOTCH1,RRM2	3
Segregation of chromosomes	0.00266	AURKA,CCNB1,NUSAP1	3
Leg type primary cutaneous diffuse large B-cell lymphoma	0.00271	MME,RRM2	2
Fanconi anemia	0.00271	RRM2,UBE2T	2
Activation of tumor cells	0.00271	NOTCH1,UBE2C	2
Cell cycle progression	0.00275	AURKA,CCDC8,CCNB1,HAS3,NOTCH1,NUSAP1,PCLAF,UBE2C,VEGFD	9
Relapsed lymphocytic cancer	0.00276	AURKA,NOTCH1,RRM2	3
Hematologic cancer of cells	0.00286	AURKA,CAVIN2,DST,FHL1,ITIH5,MME,NOTCH1,NUSAP1,PCLAF,PMAIP1,PRRG3,RRM2,SORD,UBE2C,VEGFD	15
Recurrent lymphocytic cancer	0.00286	AURKA,NOTCH1,RRM2	3
Urothelial bladder carcinoma	0.00288	ATAD2,H2BC5,NOTCH1,NUSAP1,RRM2	5
Pancreatic tumor	0.0029	ABCA9,ADAMTS5,ANKRD29,CCDC178,CCDC8,COL6A6,DST,FHL1,GPRASP1,INSYN2B,ITIH5,NOTCH1,PCLAF,PMAIP1,RRM2,SCN3A	16
Gastrointestinal carcinoma	0.0029	ABCA9,ABCB5,ADAMTS5,ANKRD29,ARHGAP20,ATAD2,AURKA,CAVIN2,CCDC178,CCDC8,CCNB1,CD300LG,CLDN5,CNN1,COL6A6,DST,FHL1,GPRASP1,HAS3,INSYN2B,ITIH5,LRFN5,LRRN4CL,MME,NOTCH1,NUSAP1,OXTR,PGM5,PRRG3,RRM2,SCN3A,SCN4B,TPD52,TUBB2B,UBE2C	35
Colony formation of prostate cancer cell lines	0.00297	RRM2,TPD52	2
Splenic marginal zone lymphoma	0.0031	MME,NOTCH1	2
Fragile X syndrome	0.0031	SCN3A,SCN4B	2
Progressive supranuclear palsy	0.0031	SCN3A,SCN4B	2
Chromosomal aberration	0.00311	AURKA,CCNB1,NOTCH1,RRM2	4
Cell movement of granule cells	0.00323	AURKA,NOTCH1	2
Partial seizure without secondary generalization	0.00323	SCN3A,SCN4B	2
Partial seizure with secondary generalization	0.00323	SCN3A,SCN4B	2
T-cell malignant neoplasm	0.00325	ARHGAP20,AURKA,CAVIN2,CCDC178,DST,MME,NOTCH1,RRM2,VEGFD	9
Alcohol use disorder	0.00329	OXTR,SCN3A,SCN4B	3
Migraines	0.00329	FHL1,SCN3A,SCN4B	3
Upper aerodigestive tract carcinoma	0.00329	AURKA,CCDC178,CCNB1,CNN1,COL6A6,DST,INSYN2B,ITIH5,LRFN5,NOTCH1,PGM5,RRM2,SCN3A,VEGFD	14
Arrest in interphase of epithelial cell lines	0.00337	CCNB1,NOTCH1	2
Mature T-cell neoplasm	0.00337	AURKA,CAVIN2,DST,MME,NOTCH1,RRM2,VEGFD	7
T-cell non-Hodgkin lymphoma	0.00346	AURKA,CAVIN2,DST,MME,NOTCH1,RRM2,VEGFD	7
Unresectable locally advanced pancreatic cancer	0.00359	RRM2	1
Contractility of dermal fibroblasts	0.00359	ADAMTS5	1
Commitment of neuronal progenitor cells	0.00359	NOTCH1	1
Accumulation of pancreatic cancer cell lines	0.00359	AURKA	1
Relapsed enteropathy-associated T-cell lymphoma	0.00359	RRM2	1
Demyelination of thoracic spinal cord	0.00359	NOTCH1	1
Oral cavity dysplasia	0.00359	NOTCH1	1
Commitment of astrocytes	0.00359	NOTCH1	1
Localization of macrophages	0.00359	NOTCH1	1
Apoptosis of lymphoid-primed multipotent progenitor cells	0.00359	PCLAF	1
Lymphopoiesis of double-positive thymocyte	0.00359	NOTCH1	1
Localized pancreatic cancer	0.00359	RRM2	1
Granulopoiesis of bone marrow cell lines	0.00359	NOTCH1	1
Aggregation of hyaluronic acid	0.00359	HAS3	1
Stage 3 locally advanced pancreatic adenocarcinoma	0.00359	RRM2	1
Formation of myosacs	0.00359	FHL1	1
Tubulation of endothelial tube	0.00359	NOTCH1	1
Vasoconstriction of umbilical artery	0.00359	MME	1
Stage IV primary peritoneal carcinoma	0.00359	RRM2	1
Elongation of vascular endothelial cells	0.00359	VEGFD	1
Density of radial glial cells	0.00359	NOTCH1	1
Proliferation of KU-CSLC cells	0.00359	NOTCH1	1
Mild Canavan disease	0.00359	ASPA	1
Formation of horizontal basal cells	0.00359	NOTCH1	1
Relapsed hepatosplenic T-cell lymphoma	0.00359	RRM2	1
Refractory enteropathy-associated T-cell lymphoma	0.00359	RRM2	1
Axonal Charcot-Marie-Tooth disease type 2T	0.00359	MME	1
Hyperplasia of alveolar wall	0.00359	NOTCH1	1
Polyploidization of mononuclear leukocytes	0.00359	AURKA	1
Delay in initiation of apoptosis of muscle cell lines	0.00359	FHL1	1
Resectable extrahepatic cholangiocarcinoma	0.00359	RRM2	1
Metastatic BRCA1 mutation negative BRCA2 mutation negative breast cancer	0.00359	RRM2	1
Poorly differentiated pancreatic carcinoma	0.00359	RRM2	1
Resectable gallbladder cancer	0.00359	RRM2	1
Ehlers-Danlos syndrome type III	0.00359	NOTCH1	1
Keratinization of cornea	0.00359	NOTCH1	1
Self-renewal of skeletal muscle satellite cells	0.00359	NOTCH1	1
Proliferation of sensory progenitor cells	0.00359	NOTCH1	1
Primary postpartum hemorrhage	0.00359	OXTR	1
Incomplete abortion	0.00359	OXTR	1
Mitogenesis of skin cancer cell lines	0.00359	VEGFD	1
Differentiation of B-2 lymphocytes	0.00359	NOTCH1	1
Colony formation of prostate cancer cells	0.00359	TPD52	1
Inevitable miscarriage	0.00359	OXTR	1
Complex cortical dysplasia with other brain malformations 1	0.00359	TUBB2B	1
Delay in initiation of condensation of chromatin	0.00359	CCNB1	1
Stage II advanced pancreatic adenocarcinoma	0.00359	RRM2	1
Migration of KU-CSLC cells	0.00359	NOTCH1	1
In situ follicular neoplasia	0.00359	MME	1
Transverse aortic constriction-induced cardiac hypertrophy	0.00359	MME	1
Cell cycle progression of satellite cells	0.00359	NOTCH1	1
Locally recurrent HER2 negative hormone receptor negative breast cancer	0.00359	RRM2	1
Differentiation of melanoma cell lines	0.00359	ABCB5	1
Frequency of innate memory phenotype CD8+ T cells	0.00359	NOTCH1	1
Hypoplasia of lymph vessel	0.00359	VEGFD	1
Arrest in G2/M phase of myeloma cell lines	0.00359	CCNB1	1
Stage III advanced pancreatic adenocarcinoma	0.00359	RRM2	1
Arrest in metaphase of microvascular endothelial cells	0.00359	CCNB1	1
Immunodeficiency 40	0.00359	INSYN2B	1
Cellular infiltration by Th1 cells	0.00359	NOTCH1	1
Spongy degeneration of central nervous system of white matter	0.00359	ASPA	1
Regeneration of neuroblasts	0.00359	NOTCH1	1
Sensitization of Saccharomyces cerevisiae	0.00359	CCNB1	1
Refractory hepatosplenic T-cell lymphoma	0.00359	RRM2	1
Stage III primary peritoneal carcinoma	0.00359	RRM2	1
Metastatic adenosquamous pancreatic carcinoma	0.00359	RRM2	1
Hyperproduction of retinal rods	0.00359	NOTCH1	1
Activation of leukemic blasts	0.00359	NOTCH1	1
Delay in initiation of differentiation of leukemia cell lines	0.00359	NOTCH1	1
Stage II primary peritoneal carcinoma	0.00359	RRM2	1
Urinary tract cancer	0.00367	ABCB5,ANKRD29,ATAD2,AURKA,CCDC8,DST,FHL1,H2BC5,ITIH5,LRFN5,MME,NOTCH1,NUSAP1,RRM2,SCN3A,UBE2C	16
Malignant neoplasm of respiratory system	0.00368	ABCB5,ADAMTS5,ATAD2,AURKA,CCDC178,CCDC8,CCNB1,COL6A6,DST,FHL1,H2BC5,ITIH5,LRFN5,NOTCH1,NUSAP1,PCLAF,PMAIP1,PRRG3,RRM2,SCN3A,UBE2C,VEGFD	22
Mantle cell lymphoma	0.00369	MME,NOTCH1,RRM2	3
Benign connective or soft tissue neoplasm	0.00378	CAVIN2,CLDN5,DST,NOTCH1,OXTR	5
Cell movement	0.00379	ADAMTS5,AURKA,CAVIN2,CCDC8,CLDN5,CNN1,DST,FHL1,HAS3,MME,NOTCH1,SORD,TPD52,TUBB2B,VEGFD	15
Arrest in G1 phase of lung cancer cell lines	0.00379	NOTCH1,PCLAF	2
Mediastinal neoplasm	0.00381	MME,NOTCH1,RRM2	3
Extraadrenal retroperitoneal tumor	0.00394	ABCA9,ADAMTS5,ANKRD29,AURKA,CCDC178,CCDC8,COL6A6,DST,FHL1,GPRASP1,INSYN2B,ITIH5,MME,NOTCH1,NUSAP1,PCLAF,PMAIP1,RRM2,SCN3A	19
Cutaneous T-cell lymphoma	0.004	AURKA,NOTCH1,RRM2	3
Upper gastrointestinal carcinoma	0.00408	ABCB5,ADAMTS5,ARHGAP20,ATAD2,AURKA,CCDC178,CCNB1,CLDN5,CNN1,COL6A6,DST,GPRASP1,INSYN2B,ITIH5,LRFN5,LRRN4CL,MME,NOTCH1,PGM5,RRM2,TPD52,UBE2C	22
Anxiety Disorders	0.00425	OXTR,SCN3A,SCN4B	3
Alcohol abuse	0.0044	SCN3A,SCN4B	2
Spindle checkpoint	0.00456	AURKA,UBE2C	2
Morphogenesis of outflow tract	0.00472	CLDN5,NOTCH1	2
Transformation of epithelial cell lines	0.00472	AURKA,NOTCH1	2
Sézary syndrome	0.00484	CAVIN2,DST,RRM2,VEGFD	4
Arrest in M phase	0.00488	CCNB1,UBE2C	2
Familial congenital malformation	0.0049	ASPA,CCNB1,DST,FHL1,NOTCH1,OXTR,PCLAF,RRM2,SCN3A,SCN4B,TUBB2B	11
Uterine leiomyosarcoma	0.00504	NOTCH1,RRM2	2
Edema of skin	0.00504	MME,VEGFD	2
Cell proliferation of hepatoma cell lines	0.00512	AURKA,NOTCH1,PCLAF,RRM2	4
Pulmonary Hypertension	0.00515	FHL1,MME,NOTCH1	3
Acute biphenotypic leukemia	0.00521	MME,RRM2	2
Apoptosis of lung cancer cell lines	0.00526	ATAD2,NOTCH1,PMAIP1,RRM2	4
Pancreatic cancer	0.00527	ABCA9,ADAMTS5,ANKRD29,CCDC178,CCDC8,COL6A6,FHL1,GPRASP1,INSYN2B,ITIH5,PCLAF,PMAIP1,RRM2,SCN3A	14
Cancer of cells	0.00529	ATAD2,AURKA,CAVIN2,CCDC178,CCNB1,CD300LG,CNN1,COL6A6,DST,FHL1,H2BC5,ITIH5,LRFN5,MME,NOTCH1,NUSAP1,PCLAF,PMAIP1,PRRG3,RRM2,SCN3A,SORD,UBE2C,VEGFD	24
Gastric carcinoma	0.00534	ABCB5,ADAMTS5,ARHGAP20,ATAD2,CCDC178,CLDN5,CNN1,DST,GPRASP1,INSYN2B,ITIH5,LRFN5,LRRN4CL,MME,NOTCH1,PGM5,TPD52,UBE2C	18
Formation of Z line	0.00538	FHL1	1
Arrest in germinal vesicle stage of oocytes	0.00538	CCNB1	1
Morphogenesis of endocardium	0.00538	NOTCH1	1
Growth of rhabdoid cell lines	0.00538	AURKA	1
Volume of gray matter	0.00538	OXTR	1
Scattering of chromosomes	0.00538	CCNB1	1
Depolarization of mitochondrial inner membrane	0.00538	CCNB1	1
Small B-cell lymphocytic lymphoma in lymph node	0.00538	NOTCH1	1
Resected gallbladder cancer	0.00538	RRM2	1
Apoptosis of stromal cell lines	0.00538	NOTCH1	1
Fragmentation of centrosome	0.00538	AURKA	1
Resected extrahepatic cholangiocarcinoma	0.00538	RRM2	1
Mutagenesis of splenocytes	0.00538	RRM2	1
Chemotaxis of skin cancer cell lines	0.00538	VEGFD	1
Catabolism of L-aspartic acid	0.00538	ASPA	1
Recurrent pain crisis	0.00538	RRM2	1
Disruption of microvascular endothelial cells	0.00538	CLDN5	1
Maintenance of radial glial cells	0.00538	NOTCH1	1
Viability of embryo	0.00538	NOTCH1	1
Transformation of Schwann cells	0.00538	NOTCH1	1
Biosynthesis of D-fructose	0.00538	SORD	1
Chronic New York Heart Association class II-IV chronic heart failure	0.00538	MME	1
Aortic valve disease type 1	0.00538	NOTCH1	1
Locally advanced KRAS mutation negative pancreatic adenocarcinoma	0.00538	RRM2	1
Self-renewal of satellite cells	0.00538	NOTCH1	1
Dispersion of granule cells	0.00538	NOTCH1	1
Quantity of cerebellar granule cell	0.00538	ASPA	1
Development of processus vaginalis	0.00538	NOTCH1	1
Cell cycle progression of chronic lymphocytic leukemia cells	0.00538	NOTCH1	1
Sporadic visceral glomus tumor	0.00538	NOTCH1	1
Mutagenesis of lung cells	0.00538	RRM2	1
Response of breast cell lines	0.00538	NOTCH1	1
Metastatic anaplastic carcinoma of the pancreas	0.00538	RRM2	1
Differentiation of transitional 1 B lymphocytes	0.00538	NOTCH1	1
Sporadic soft tissue glomus tumor	0.00538	NOTCH1	1
Retention of hyaluronic acid	0.00538	HAS3	1
Specification of sensory progenitor cells	0.00538	NOTCH1	1
Firing of serotonergic neurons	0.00538	OXTR	1
Child-Pugh class A gallbladder cancer	0.00538	RRM2	1
Development of Th9 cells	0.00538	NOTCH1	1
Development of atrioventricular node	0.00538	NOTCH1	1
Delay in initiation of separation of centrosome	0.00538	AURKA	1
Ependymoma in brain	0.00538	NOTCH1	1
Primary mediastinal large B-cell lymphoma	0.00538	MME,RRM2	2
Transmembrane potential	0.0054	ABCB5,NOTCH1,PMAIP1,TPD52	4
Alzheimer disease	0.00554	ATAD2,CCNB1,CLDN5,CNN1,MME,NOTCH1	6
Apoptosis of bone cancer cell lines	0.00592	ATAD2,CCDC8,PMAIP1	3
Small B-cell lymphocytic lymphoma	0.00593	DST,FHL1,ITIH5,NOTCH1,RRM2	5
Non-Hodgkin lymphoma	0.00604	AURKA,CAVIN2,DST,FHL1,ITIH5,MME,NOTCH1,PMAIP1,RRM2,VEGFD	10
Formation of filaments	0.0062	AURKA,FHL1,MME,NOTCH1,NUSAP1	5
Spinocerebellar ataxia type 7	0.00627	SCN3A,SCN4B	2
Fibromyalgia	0.00627	SCN3A,SCN4B	2
Bladder carcinoma	0.00644	ABCB5,ATAD2,CCDC8,DST,H2BC5,LRFN5,NOTCH1,NUSAP1,RRM2,SCN3A,UBE2C	11
Hereditary cancer	0.00647	AURKA,MME,NOTCH1,RRM2	4
Connective or soft tissue tumor	0.00649	ABCA9,ABCB5,ADAMTS5,ANKRD29,ARHGAP20,ATAD2,AURKA,CAVIN2,CCDC178,CCDC8,CCNB1,CD300LG,CLDN5,CNN1,COL6A6,DST,FHL1,GPRASP1,INSYN2B,ITIH5,LRFN5,MME,NOTCH1,NUSAP1,OXTR,PGM5,PRRG3,RRM2,SCN3A,UBE2C,VEGFD	31
Hereditary skeletal myopathy	0.0066	COL6A6,DST,FHL1,MME,RRM2	5
Tourette syndrome	0.00665	SCN3A,SCN4B	2
Maturation of oocytes	0.00665	AURKA,CCNB1	2
Obesity	0.00667	CAVIN2,CCNB1,MME,OXTR,SCN3A,SCN4B	6
Intrathoracic malignant tumor	0.00668	ABCB5,ADAMTS5,ATAD2,AURKA,CCDC178,CCDC8,CCNB1,DST,FHL1,H2BC5,LRFN5,MME,NOTCH1,NUSAP1,PCLAF,PMAIP1,PRRG3,RRM2,UBE2C,VEGFD	20
Adenomyosis	0.00684	DST,OXTR	2
Arrest in G1 phase of carcinoma cell lines	0.00703	NOTCH1,PCLAF	2
High-grade diffuse B-cell lymphoma	0.00703	MME,RRM2	2
Degeneration of notochord	0.00716	NOTCH1	1
Quiescence of long-term hematopoietic stem cells	0.00716	PCLAF	1
Corneal opacity	0.00716	NOTCH1	1
Arrest in cell cycle progression of squamous cell carcinoma cell lines	0.00716	AURKA	1
Migratory capacity of bone cancer cell lines	0.00716	VEGFD	1
Ejection of first polar body	0.00716	CCNB1	1
PDGBR rearrangement negative Philadelphia chromosome negative t(5;12)(q33;p13) negative chronic myelomonocytic leukemia	0.00716	RRM2	1
Mixed phenotype B cell acute leukemia	0.00716	MME	1
Cytogenetic abnormality positive loss of Y chromosome negative Philadelphia chromosome negative t(5;12)(q33;p13) negative CMML	0.00716	RRM2	1
Aberration of centromeres	0.00716	CCNB1	1
Development of long-term hematopoietic stem cells	0.00716	PCLAF	1
Development of gubernaculum	0.00716	NOTCH1	1
Postmyocardial infarction syndrome	0.00716	MME	1
Relapsed angioimmunoblastic T-cell lymphoma	0.00716	RRM2	1
Arrest in cell cycle progression of rhabdoid cell lines	0.00716	AURKA	1
Uterine inertia	0.00716	OXTR	1
Proliferation of mesothelial cells	0.00716	NOTCH1	1
Neurodegeneration of frontal cortex	0.00716	MME	1
Recurrent vaso-occlusive crisis	0.00716	RRM2	1
Stable disease stage heart failure	0.00716	MME	1
1p/19q co-deletion positive IDH mutation positive oligodendroglioma	0.00716	NOTCH1	1
Posthemorrhagic anemia	0.00716	OXTR	1
New York Heart Association class II heart failure	0.00716	MME	1
Recurrent gallbladder cancer	0.00716	RRM2	1
Production of follicular B lymphocytes	0.00716	NOTCH1	1
Symptomatic stage chronic systolic heart failure	0.00716	MME	1
Myeloproliferative chronic myelomonocytic leukemia	0.00716	RRM2	1
Polyploidy of bone marrow cells	0.00716	AURKA	1
Differentiation of endocardial cells	0.00716	NOTCH1	1
Nocturnal hypertension	0.00716	MME	1
Refractory angioimmunoblastic T-cell lymphoma	0.00716	RRM2	1
Cell death of pancreatic cancer cell lines	0.00719	AURKA,NOTCH1,UBE2C	3
Leiomyoma	0.0072	CAVIN2,CLDN5,DST,OXTR	4
Gastrointestinal adenocarcinoma	0.0072	ABCA9,ABCB5,ADAMTS5,ANKRD29,ARHGAP20,ATAD2,AURKA,CAVIN2,CCDC178,CCDC8,CCNB1,CD300LG,CLDN5,COL6A6,DST,FHL1,GPRASP1,HAS3,INSYN2B,ITIH5,LRFN5,LRRN4CL,MME,NOTCH1,NUSAP1,OXTR,PGM5,PRRG3,RRM2,SCN3A,SCN4B,TUBB2B,UBE2C	33
Low-grade lymphoma	0.00722	DST,FHL1,ITIH5,MME,NOTCH1,RRM2	6
Spinal muscular atrophy	0.00723	DST,RRM2	2
Abnormal morphology of embryoblast	0.00723	AURKA,NUSAP1	2
Cervical squamous cell carcinoma	0.00764	AURKA,DST,ITIH5,NOTCH1,RRM2	5
Colon adenocarcinoma	0.00777	ABCA9,ABCB5,ADAMTS5,ARHGAP20,ATAD2,CAVIN2,CCDC178,CD300LG,COL6A6,DST,FHL1,INSYN2B,LRRN4CL,MME,NOTCH1,NUSAP1,PGM5,PRRG3,SCN3A,SCN4B,TUBB2B	21
Organization of cytoskeleton	0.00784	ARHGAP20,AURKA,CCDC8,CCNB1,DST,HAS3,NOTCH1,NUSAP1,SCN4B,VEGFD	10
Myelination	0.00811	ASPA,CLDN5,DST,NOTCH1	4
Proliferation of vascular cells	0.00811	CAVIN2,FHL1,NOTCH1,VEGFD	4
Hutchinson-Gilford progeria syndrome	0.00812	DST,HAS3,TUBB2B	3
Proliferation of tumor cells	0.00815	AURKA,FHL1,NOTCH1,TPD52,UBE2C	5
Ataxia	0.00817	ASPA,MME,SCN3A,SCN4B	4
Chronic lymphocytic leukemia / small lymphocytic lymphoma	0.00822	DST,FHL1,ITIH5,MME,NOTCH1,RRM2	6
Organization of mitotic spindle	0.00824	AURKA,CCNB1	2
Soft tissue sarcoma	0.00836	DST,ITIH5,MME,NOTCH1,PRRG3,RRM2,UBE2C,VEGFD	8
Sarcoma	0.00865	CNN1,DST,ITIH5,MME,NOTCH1,PRRG3,RRM2,UBE2C,VEGFD	9
Thymic epithelial tumor	0.00867	NOTCH1,RRM2	2
Intestinal adenocarcinoma	0.00878	ABCA9,ABCB5,ADAMTS5,ANKRD29,ARHGAP20,ATAD2,AURKA,CAVIN2,CCDC178,CCDC8,CCNB1,CD300LG,CLDN5,COL6A6,DST,FHL1,HAS3,INSYN2B,ITIH5,LRFN5,LRRN4CL,MME,NOTCH1,NUSAP1,OXTR,PGM5,PRRG3,RRM2,SCN3A,SCN4B,TUBB2B,UBE2C	32
Clearance of amyloid fibrils	0.00894	MME	1
Delay in initiation of mitotic entry of cervical cancer cell lines	0.00894	AURKA	1
Demyelination of corpus callosum	0.00894	ASPA	1
Aneuploidy of epithelial cells	0.00894	AURKA	1
Density of fibroblast cell lines	0.00894	HAS3	1
Dissemination of melanoma cell lines	0.00894	CNN1	1
Cellularity of renal glomerulus	0.00894	CNN1	1
Assembly of plus end of microtubule	0.00894	AURKA	1
Clonogenicity of cervical cancer cell lines	0.00894	NOTCH1	1

## Sheet: d. Canonical Pathways by IPA
© 2000-2022 QIAGEN. All rights reserved.
Ingenuity Canonical Pathways	-log(p-value)	Ratio	Molecules
Sorbitol Degradation I	2.74	1	SORD
Cell Cycle: G2/M DNA Damage Checkpoint Regulation	2.44	0.04	AURKA,CCNB1
Pulmonary Healing Signaling Pathway	2.26	0.0151	CCNB1,NOTCH1,VEGFD
Hypoxia Signaling in the Cardiovascular System	2.08	0.0263	UBE2C,UBE2T
Osteoarthritis Pathway	2.06	0.0127	ADAMTS5,NOTCH1,VEGFD
Pulmonary Fibrosis Idiopathic Signaling Pathway	1.69	0.0092	COL6A6,NOTCH1,PMAIP1
GDP-glucose Biosynthesis	1.67	0.0833	PGM5
Pancreatic Adenocarcinoma Signaling	1.67	0.0159	NOTCH1,VEGFD
Breast Cancer Regulation by Stathmin1	1.67	0.00673	AURKA,OXTR,TUBB2B,VEGFD
Glucose and Glucose-1-phosphate Degradation	1.64	0.0769	PGM5
Glycogen Degradation II	1.64	0.0769	PGM5
Role Of Chondrocytes In Rheumatoid Arthritis Signaling Pathway	1.58	0.0142	ADAMTS5,VEGFD
Glycogen Degradation III	1.58	0.0667	PGM5
DNA damage-induced 14-3-3σ Signaling	1.47	0.0526	CCNB1
Pyrimidine Deoxyribonucleotides De Novo Biosynthesis I	1.39	0.0435	RRM2
Molecular Mechanisms of Cancer	1.34	0.00673	AURKA,NOTCH1,PMAIP1
Hepatic Fibrosis / Hepatic Stellate Cell Activation	1.32	0.0103	COL6A6,VEGFD
